# Supplementary material for: Enhancing the nutritional profile of regular wheat bread while maintaining technological quality and adequate sensory attributes
Source: Royal Society of Chemistry journal article supplement (doi:10.1039/d0fo00671h), 2020-01-01
Supplement: d0fo00671h1.pdf [file d0fo00671h1.pdf]

## ELECTRONIC SUPPLEMENTARY INFORMATION (ESI)

for Food & Function article "Enhancing the nutritional profile of regular wheat bread while maintaining technological quality and adequate sensory attributes"

Andrea Hoehnel,<sup>a</sup> Jürgen Bez,<sup>b</sup> Iben Lykke Petersen,<sup>c</sup> Ryszard Amarowicz,<sup>d</sup> Jerzy Juśkiewicz,<sup>d</sup> Elke K. Arendt,<sup>\*a,e</sup> and Emanuele Zannini<sup>a</sup>

### Microbiological Shelf Life and Water Activity of Reference Wheat Bread (RWB) and High-Protein Hybrid Bread (HPHB)

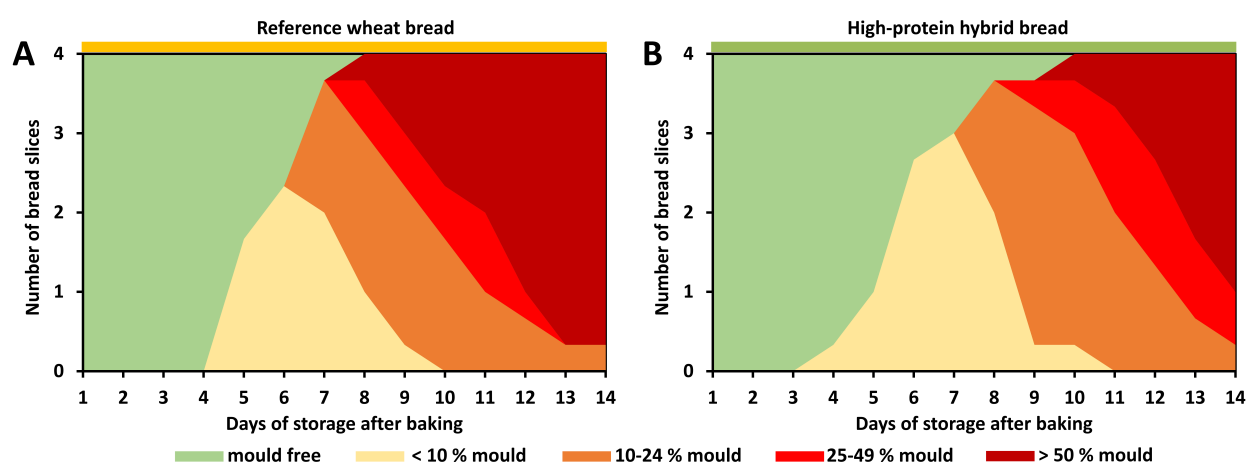

**Fig. 1** Microbiological shelf life of (A) RWB and (B) HPHB as indicated by ambient air challenge test. Results represent the mean of three independently performed challenge tests.

### Results and Discussion

In addition to crumb staling, the shelf life of bread is affected by microbial deterioration. While also bacteria and yeast can cause bread spoilage, a contamination with fungal spores from the bakery environment after baking is considered the most common reason.<sup>1</sup> Mold growth typically shows a positive correlation with water availability in the food product; the critical water activity, however, varies with fungal species, temperature and substrate.<sup>2</sup> Apart from an unpleasant visual experience for consumers, mould

spoilage can cause the formation of off-flavours, allergenic compounds and mycotoxins, potentially even before visibility of fungal growth.<sup>3</sup> It also leads to a substantial amount of food waste - in UK households an estimated 20 % of bread goes to waste due to mould growth.<sup>4,5</sup> Therefore, susceptibility to mould deterioration represents a food safety hazard and indicator for economic loss and should be considered when bread quality is evaluated. The microbial shelf life of both bread formulations was monitored in an ambient air challenge test. The results are presented in Figure 1. A slight tendency towards earlier onset of mould growth for HPHB was observed. The results also suggest a deceleration of mould growth in HPHB represented by later onset of stages 3 - 5 (10 to > 50 % of slices covered in mould). However, these tendencies cannot be considered significant differences and the experiment generally indicated a similar microbial shelf life of HPHB and RWB. This observation can be supported by very similar water activities measured for both formulations (RWB  $0.945 \pm 0.003$ , HPHB  $0.943 \pm 0.003$ ).

<sup>a</sup> University College Cork, School of Food and Nutritional Sciences, College Road, Ireland. Tel: +353 21 490 2064; E-mail: e.arendt@ucc.ie

<sup>b</sup> Fraunhofer Institute for Process Engineering and Packaging, 85354 Freising, Germany.

<sup>c</sup> Department of Food Science, University of Copenhagen, Rolighedsvej 26, 1958 Frederiksberg C., Denmark.

<sup>d</sup> Institute of Animal Reproduction and Food Research of the Polish Academy of Sciences, Tuwima, St. 10, 10-748 Olsztyn, Poland.

<sup>e</sup> APC Microbiome Ireland, Cork, Ireland.

## Materials and Methods used for the Determination of Microbiological Shelf Life and Water Activity

Microbiological shelf life of the breads was evaluated using an ambient mould challenge test as described by Dal Bello *et al.*<sup>6</sup> with some modifications. Bread loaves were sliced in a sterile manner to obtain four slices of 20 mm thickness per loaf. Instead of a treatment with conidial solutions of fungi, each slice was microbiologically challenged by exposure to the bakery ambient air for 5 min on each side. The slices were separately packed in sterile plastic bags which were heat sealed. To guarantee comparable aerobic conditions in all bags, a filter pipette tip was inserted. During a storage period of 14 days (at room temperature), mould growth was visually evaluated. Based on the percentage of slice area covered with fungal growth, slices were sorted into five categories as follows: 0 % - mould free, <10 % mould, 10-24 % mould, 25-49 % mould, >50 % mould. Four slices were monitored from each of three batches per formulation. Water activity of the fresh bread crumb was measured using a water activity meter (HygroLab, Rotronic, Basserdorf, Switzerland).

## Abbreviations

The following abbreviations were used:

|      |                           |
|------|---------------------------|
| HPHB | High-protein hybrid bread |
| RWB  | Reference wheat bread     |

## References

- 1 R. A. Knight and E. M. Menlove, Effect of the bread-baking process on destruction of certain mould spores, *J. Sci. Food Agric.*, 1961, **12**, 653–656.
- 2 N. Markova and L. Wadsö, A microcalorimetric method of studying mould activity as a function of water activity, *Int. Biodeterior. Biodegrad.*, 1998, **42**, 25–28.
- 3 N. Magan and G. Keshri, *Advances in stored product protection. Proceedings of the 8th International Working Conference on Stored-Product Protection, York, UK, 22-26 July 2002: Use of electronic nose technology for the early detection of spoilage moulds in cereal products*, CAB International, Wallingford, United Kingdom, 22nd edn, 2003, pp. 139–143.
- 4 L. Ventour, *Food waste report v2: The food we waste*, Waste & Resources Action Programme, 2008, vol. 2, pp. 1–237.
- 5 C. Axel, E. Zannini and E. K. Arendt, Mold spoilage of bread and its biopreservation: A review of current strategies for bread shelf life extension, *Crit. Rev. Food Sci. Nutr.*, 2017, **57**, 3528–3542.
- 6 F. Dal Bello, C. I. Clarke, L. A. Ryan, H. Ulmer, T. J. Schober, K. Ström, J. Sjögren, D. van Sinderen, J. Schnürer and E. K. Arendt, Improvement of the quality and shelf life of wheat bread by fermentation with the antifungal strain *Lactobacillus plantarum* FST 1.7, *J. Cereal Sci.*, 2007, **45**, 309–318.
